# Supplementary material for: Piscine orthoreovirus sequences in escaped farmed Atlantic salmon in Washington and British Columbia
Source: PubMed Central journal article supplement (PMC6444584; doi:10.1186/s12985-019-1148-2), 2019-04-02
Supplement: 12985_2019_1148_MOESM2_ESM.pdf [file 12985_2019_1148_MOESM2_ESM.pdf]

0.05  
LC145616

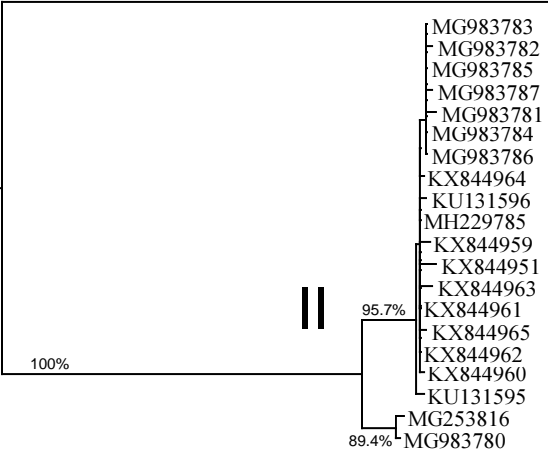

- MG983783
- MG983782
- MG983785
- MG983787
- MG983781
- MG983784
- MG983786
- KX844964
- KU131596
- MH229785
- KX844959
- KX844951
- KX844963
- KX844961
- KX844965
- KX844962
- KX844960
- KU131595
- MG253816
- MG983780

Ia

- MH215518
- MH558129
- MH215519
- MH215525
- MH215517
- MH215523
- MH215527
- K1456505
- MH215524
- MH215521
- Case\_18\_01\_Sample\_7
- MH215520
- MH558133
- MH558132
- MH558131
- MH558130
- MH215522
- MH215526

- HG329893
- HG329845
- HG329844
- HG329900
- HG329853
- HG329855
- HG329856
- HG329857
- HG329899
- HG329898
- HG329861
- HG329897
- HG329895
- HG329862
- HG329894
- HG329892
- HG329877
- HG329864
- HG329874
- HG329873
- HG329872
- HG329870
- HG329867
- HG329865
- HG329866
- JN991009
- KU131604
- KU131599
- KU131597
- KU131600
- KU131602
- KC795571
- KR337479
- KU131598
- KU131603
- KU131601
- JN991011
- JN991010
- KY429949
- KU131605
- HG329846
- HG329847
- HG329860
- KC782501
- HG329901
- HG329884
- KC790988
- GU994022
- KX844952

Ib

100%

94.7%

la

HG329890  
HG329876  
HG329869  
HG329880  
HG329883  
HG329885  
HG329886  
HG329889  
JN991008  
HG329848  
HG329875  
HG329871  
HG329882  
HG329849  
HG329842  
HG329843  
JN991012  
JN991007  
HG329888  
HG329887  
HG329881  
HG329854  
HG329852  
HG329879  
MF946300  
HG329878  
HG329891  
HG329868  
HG329859  
HG329863  
HG329896  
HG329858  
HG329851  
HG329850  
JN991006  
MH581199  
KT456504  
KC473452  
K1456503  
MH581203  
KX851970  
KT456500  
KX851971  
MH581200  
KC473454  
MH581202  
MF946299  
KX844955  
KX844957  
KX844958  
KX844954  
KX844956  
KU131591  
KX844953  
KU131594  
KU131593  
MH581212  
MH581211  
KR872637  
MH581206  
MH581195  
MH581204  
KT429746  
MH581192  
MH581210  
MH581209  
MH581193  
MF946290  
MH581196  
MH581194  
KU131592  
KR872635  
MH581197  
MH581198  
KT456502  
KT456501  
MH581201  
KR872636  
MH581208  
MH581205  
KC795601  
KU160515  
MH581207  
KU160514  
KC795599  
KC473453  
KC795600  
KU160513
